# Supplementary material for: ShinyEvents: harmonizing longitudinal data for real world survival estimation
Source: Research Square preprint supplement (doi:10.21203/rs.3.rs-7231850/v1), 2025-08-06
Supplement: Supplementary file 1 [file 75dc190436d999e60c1c6767.pdf]

Figure S1

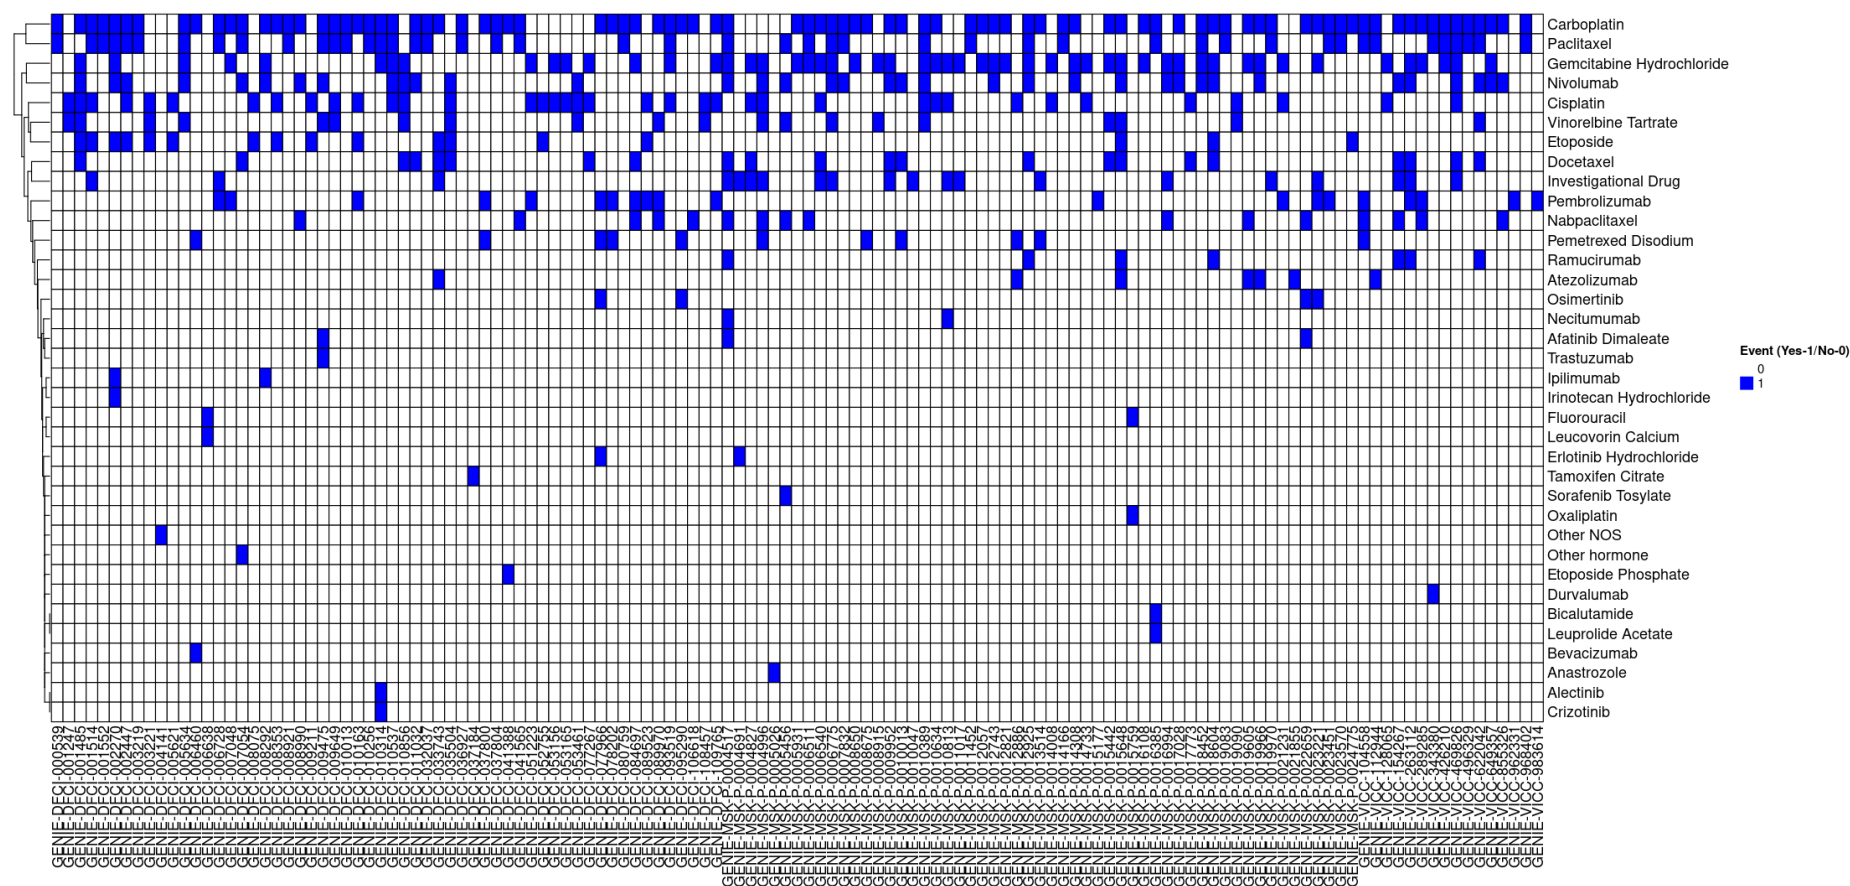

Figure S1. Patient-level treatment heatmap. Each column represent a patient and each row shows the drug.

Figure S2.

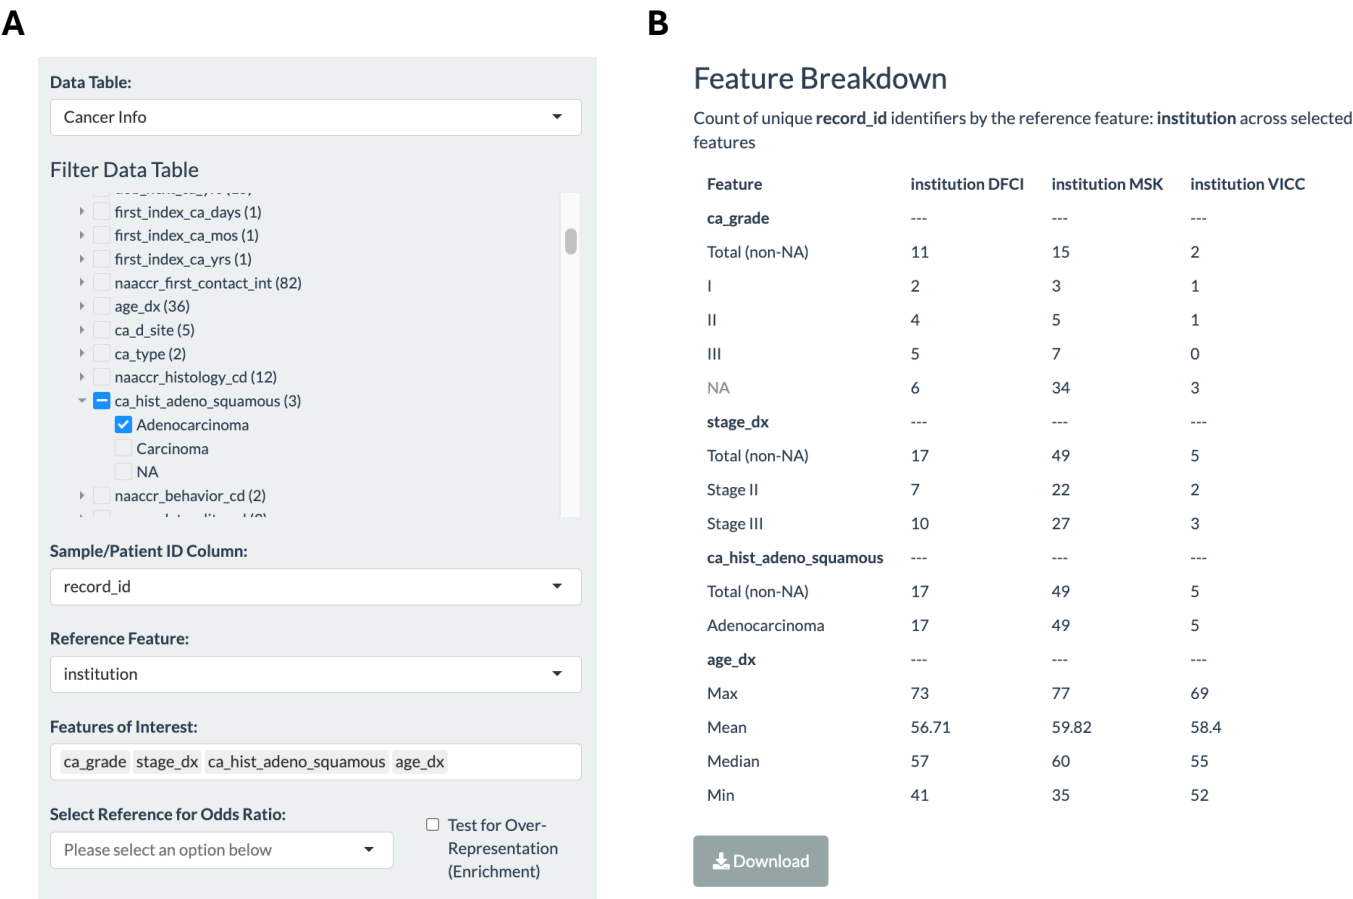

Feature Breakdown

Count of unique record\_id identifiers by the reference feature: institution across selected features

| Feature                | institution DFCI | institution MSK | institution VICC |
|------------------------|------------------|-----------------|------------------|
| ca_grade               | ---              | ---             | ---              |
| Total (non-NA)         | 11               | 15              | 2                |
| I                      | 2                | 3               | 1                |
| II                     | 4                | 5               | 1                |
| III                    | 5                | 7               | 0                |
| NA                     | 6                | 34              | 3                |
| stage_dx               | ---              | ---             | ---              |
| Total (non-NA)         | 17               | 49              | 5                |
| Stage II               | 7                | 22              | 2                |
| Stage III              | 10               | 27              | 3                |
| ca_hist_adeno_squamous | ---              | ---             | ---              |
| Total (non-NA)         | 17               | 49              | 5                |
| Adenocarcinoma         | 17               | 49              | 5                |
| age_dx                 | ---              | ---             | ---              |
| Max                    | 73               | 77              | 69               |
| Mean                   | 56.71            | 59.82           | 58.4             |
| Median                 | 57               | 60              | 55               |
| Min                    | 41               | 35              | 52               |

Download

**Figure S2.** ShinyEvents facilitates the exploration of the data and can easily obtain a high-level summary of the data. A) The user can filter and restrict patients or samples based on the ID column. In the example, the number of incidence across institutions were stratified based on cancer grade, staging, and histology. The age distribution was also calculated.

Figure S3

A

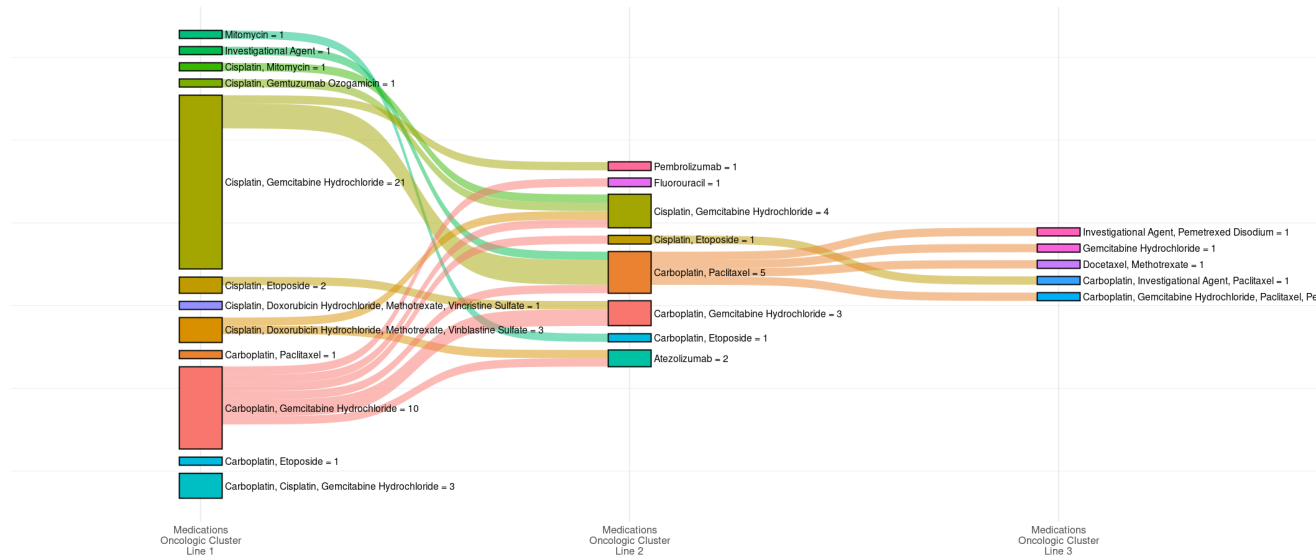

B

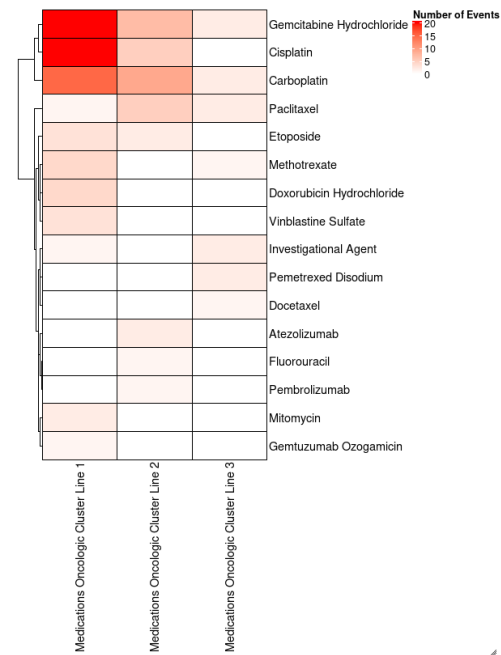

**Figure S3.** Treatment cluster based on a 3-month window in the Moffitt BLCA cohort. **A)** Sankey plot showing the oncologic treatment clusters. **B)** The heatmap shows the number of patients treated with the drug in each treatment line.

Figure S4

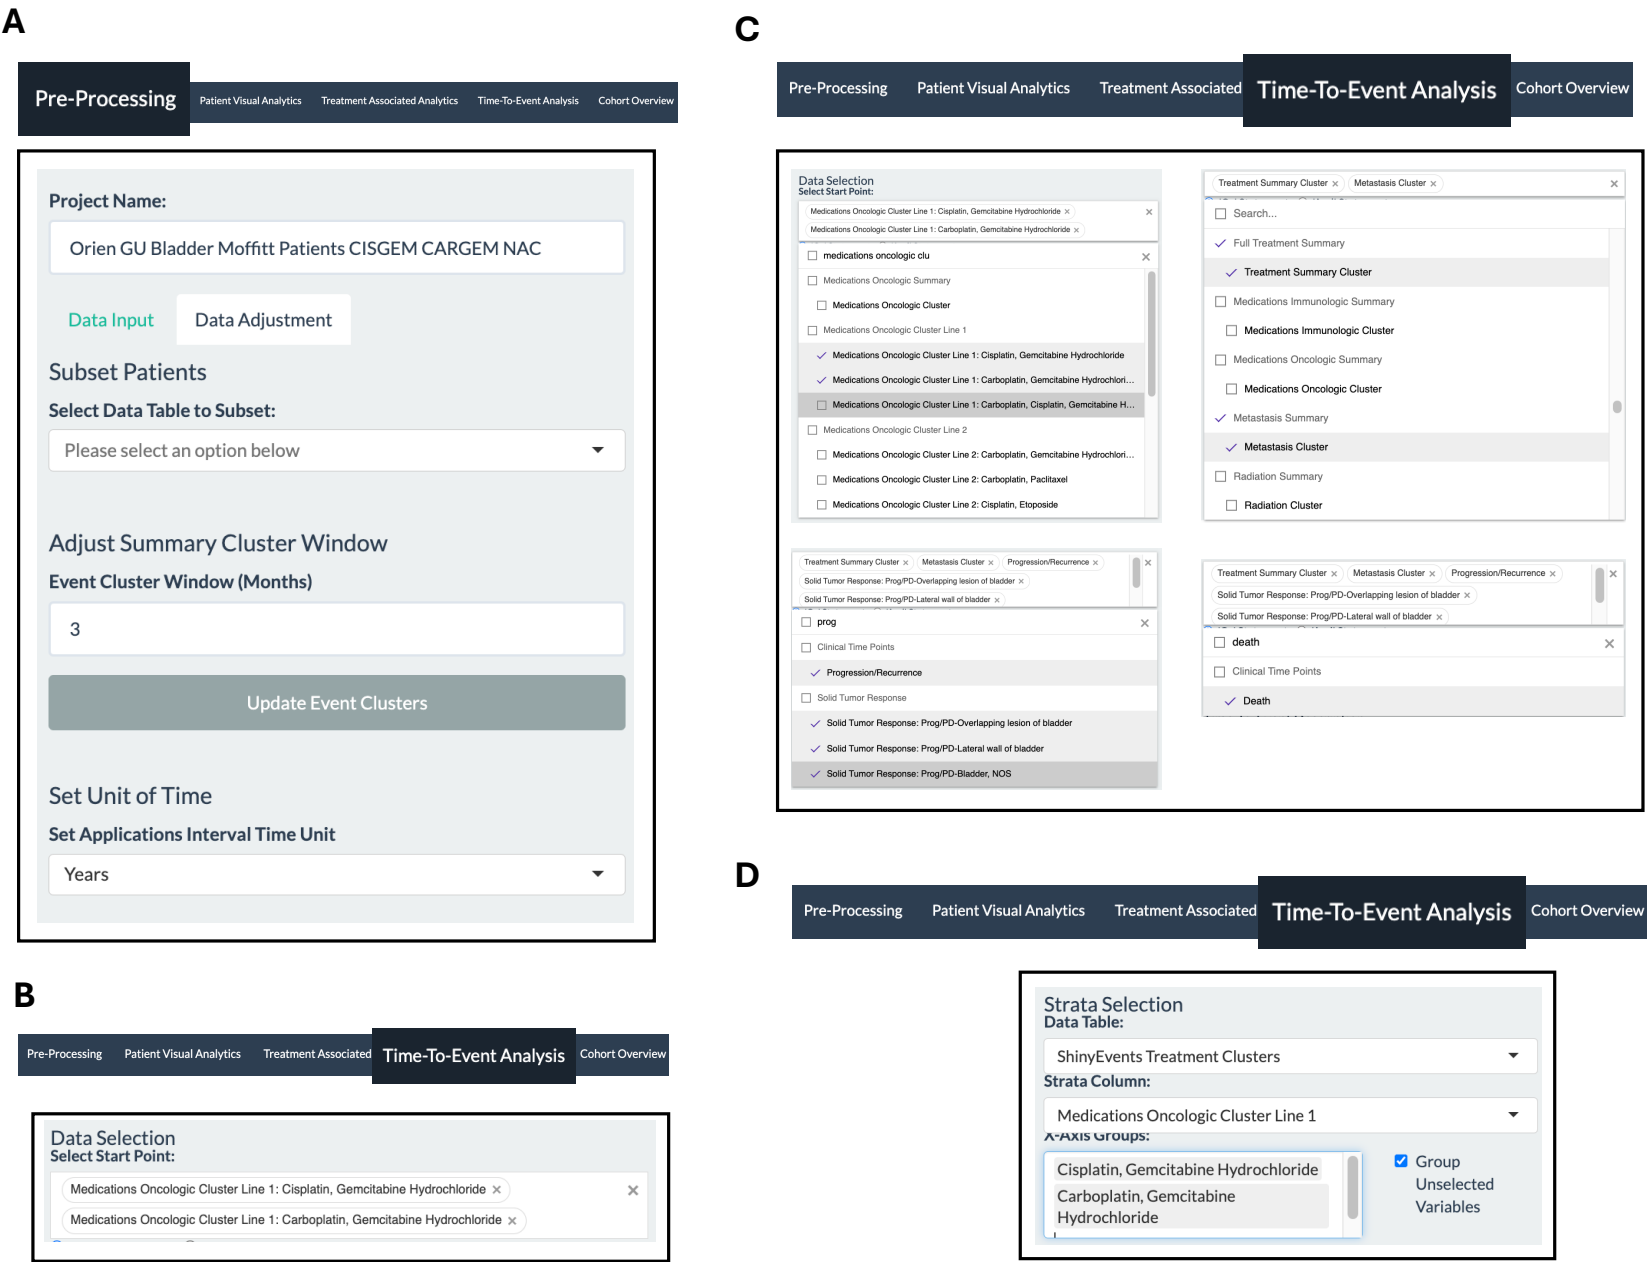

**Figure S4. A)** setting the treatment clustering window, **B)** selecting the starting time, **C)** defining the surrogate end point, and **D)** defining the groups for the survival analysis..

Figure S5

A

{ ShinyEvents }

About

Pre-Processing

Patient Visual Analytics

Treat

Project Name:

ShinyEvents

Data Input

Data Adjustment

Step 1:

Event Data Upload ⓘ

Browse...

No file selected

Load Example Data

🔗 Click here to view event data input formatting

B

## Event Data Help

The event data file must include at least four columns: patient ID, event name, event start time, and event end time.

Optional columns can include event type, event details, or patient details to aid in filtering and grouping.

### Event Data Column Descriptions

Show 3 entries

Search:

| Column Type        | Note     | Description                                                                                                    | Example                                                                   |
|--------------------|----------|----------------------------------------------------------------------------------------------------------------|---------------------------------------------------------------------------|
| 1 Patient ID       | Required | Unique identifier for each patient.                                                                            | 'Patient 1','Patient 2','Patient 3'                                       |
| 2 Event Name       | Required | Specific clinical events the patient encountered.                                                              | 'Diagnosis','Cisplatin treatment','Progression','Radiation to Lymph Node' |
| 3 Event Start Time | Required | Numeric start time for the event with units of years, days, months, or hours. Units will be entered in app UI. | 58.75, 21458.44, 705, 12                                                  |

Showing 1 to 3 of 7 entries

Previous 1 2 3 Next

### Example Event Data

Show 3 entries

Search:

| PatientID   | Event Name               | Event Type     | Event Start | Event End | Event Detail        | Sex  | Race                      |
|-------------|--------------------------|----------------|-------------|-----------|---------------------|------|---------------------------|
| 1 Patient 1 | Diagnosis                | Clinical Event | 43.75       | 43.75     | Papillary Carcinoma | Male | Black or African American |
| 2 Patient 1 | Cisplatin                | Medication     | 43.98       | 44.72     |                     | Male | Black or African American |
| 3 Patient 1 | Gemcitabin Hydrochloride | Medication     | 43.98       | 44.72     |                     | Male | Black or African American |

Showing 1 to 3 of 23 entries

Previous 1 2 3 4 5 ... 8 Next

Dismiss

Figure S5. Input format requirements. A) Button to access input formatting requirements. B) Key input columns that is required as input.
